# Supplementary material
Source: publisher site journal article supplement (https://www.dovepress.com/article/452447)
Supplement: Supplementary file 1 [file get_supplementary_file.php]

Supplemental Table 1 The demographic characteristics of the sample

| Variables |  | Male  (291) |  | Female  (599) |  |
| --- | --- | --- | --- | --- | --- |
|  |  | n | % | n | % |
| Parents’ marriage status | Stable marriage | 249 | 85.60% | 497 | 83.00% |
|  | Divorce | 23 | 7.90% | 43 | 7.20% |
|  | Remarriage | 11 | 3.80% | 32 | 5.30% |
|  | Widowhood/widowerhood | 8 | 2.70% | 20 | 3.30% |
|  | Other | 0 | 0 | 6 | 1.00% |
|  | Missing data | 0 | 0 | 1 | 0.20% |
| Only child | Yes | 96 | 33.00% | 147 | 24.50% |
|  | No | 195 | 67.00% | 451 | 75.30% |
|  | Missing data | 0 | 0 | 1 | 0.20% |
| Physical condition | Very healthy | 142 | 48.80% | 258 | 43.10% |
|  | Good | 125 | 43.00% | 291 | 48.60% |
|  | Average | 21 | 7.20% | 44 | 7.30% |
|  | Poor | 2 | 0.70% | 5 | 0.80% |
|  | Missing data | 1 | 0.30% | 1 | 0.20% |
| Residential address | Countryside | 156 | 53.60% | 319 | 53.30% |
|  | City | 133 | 45.70% | 277 | 46.20% |
|  | Missing data | 2 | 0.70% | 3 | 0.50% |
| Parents go out to work | Yes | 98 | 33.70% | 270 | 45.10% |
|  | No | 192 | 66.00% | 327 | 54.60% |
|  | Missing data | 1 | 0.30% | 2 | 0.30% |
| Family financially difficulty | Yes | 81 | 27.80% | 232 | 38.70% |
|  | No | 206 | 70.80% | 360 | 60.10% |
|  | Missing data | 4 | 1.40% | 7 | 1.20% |
